# Supplementary material for: Common UCP2 variants contribute to serum urate concentrations and the risk of hyperuricemia
Source: PubMed Central journal article supplement (PMC4897637; doi:10.1038/srep27279), 2016-06-08
Supplement: srep27279-s1.pdf [file srep27279-s1.pdf]

# Common *UCP2* variants contribute to serum urate concentrations and the risk of hyperuricemia

Luyu Yang<sup>1¶</sup>, Zheng Dong<sup>1¶</sup>, Jingru Zhou<sup>1</sup>, Yanyun Ma<sup>1</sup>, Weilin Pu<sup>1</sup>, Dongbao Zhao<sup>2</sup>, Hongjun He<sup>3</sup>,  
Hengdong Ji<sup>4</sup>, Yajun Yang<sup>1,5</sup>, Xiaofeng Wang<sup>1,5</sup>, Xia Xu<sup>2</sup>, Yafei Pang<sup>2</sup>, Hejian Zou<sup>6,7</sup>, Li Jin<sup>1,5</sup>,  
Chengde Yang<sup>8\*</sup>, Jiucun Wang<sup>1,5,7\*</sup>

<sup>1</sup>State Key Laboratory of Genetic Engineering and Ministry of Education Key Laboratory of Contemporary Anthropology, Collaborative Innovation Center for Genetics and Development, School of Life Sciences, Fudan University, Shanghai, China.

<sup>2</sup>Division of Rheumatology and Immunology, Changhai Hospital, Shanghai, China.

<sup>3</sup>Division of Rheumatology, Taixing People's Hospital, Jiangsu Province, China.

<sup>4</sup>Division of Rheumatology, Taizhou People's Hospital, Jiangsu Province, China.

<sup>5</sup>Fudan-Taizhou Institute of Health Sciences, Taizhou, Jiangsu Province, China.

<sup>6</sup>Division of Rheumatology, Huashan Hospital, Fudan University, Shanghai, China.

<sup>7</sup>Institute of Rheumatology, Immunology and Allergy, Fudan University, Shanghai, China.

<sup>8</sup>Division of Rheumatology, Ruijin Hospital, Shanghai Jiaotong University School of Medicine, Shanghai, China.

\*Corresponding author

E-mail: [yangchengde@sina.com](mailto:yangchengde@sina.com) (Chengde Yang), [jcwang@fudan.edu.cn](mailto:jcwang@fudan.edu.cn) (Jiucun Wang)

¶These authors equally contributed to this study.

**S.Table 1. Characteristics of hyperuricemia and healthy control\***

|                      | Control      | Hyperuricemia |
|----------------------|--------------|---------------|
| Number               | 2945         | 1387          |
| Male/Female          | 2077/868     | 1060/327      |
| Age (year)           | 69.00±9.25   | 67.91±11.93   |
| Height (cm)          | 161.37±7.52  | 162.63±7.54   |
| Weight (kg)          | 63.71±9.96   | 68.56±11.12   |
| BMI                  | 24.43±3.24   | 25.88±3.52    |
| Smoking              | 87.05%       | 72.33%        |
| Serum Urate (umol/L) | 300.73±63.13 | 482.30±61.14  |

\*All data shown in mean±SD
